# Supplementary material for: Fluorinated Boron-Dipyrromethene (BODIPY) Dyes: Bright and Versatile Probes for Surface Analysis
Source: PubMed Central journal article supplement (PMC3594589; doi:10.1002/open.201200039), 2013-01-09
Supplement: open0002-0025-SD1.pdf [file open0002-0025-SD1.pdf]

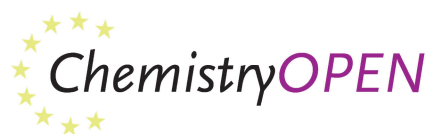

## Supporting Information

© 2013 The Authors. Published by Wiley-VCH Verlag GmbH & Co. KGaA, Weinheim

### **Fluorinated Boron-Dipyrromethene (BODIPY) Dyes: Bright and Versatile Probes for Surface Analysis**

Mandy Hecht,<sup>[a]</sup> Tobias Fischer,<sup>[a]</sup> Paul Dietrich,<sup>[b]</sup> Werner Kraus,<sup>[c]</sup> Ana B. Descalzo,<sup>[a, d]</sup>  
Wolfgang E. S. Unger,<sup>[b]</sup> and Knut Rurack\*<sup>[a]</sup>

open\_201200039\_sm\_miscellaneous\_information.pdf

## Table of contents

|                                                                                                   |     |
|---------------------------------------------------------------------------------------------------|-----|
| Photostability measurements (incl. Fig. S1) .....                                                 | S2  |
| Table S1 Bond length and angles of the $\text{BF}_2\text{N}_2$ tetrahedron .....                  | S3  |
| Table S2 Additional selected spectroscopic data of <b>1–8</b> .....                               | S4  |
| Table S3 Important geometric features of the calculated structures of <b>3</b> and <b>4</b> ..... | S5  |
| Table S4 Total formal XPS elemental composition .....                                             | S6  |
| Figure S2 High resolution N 1s spectra .....                                                      | S7  |
| Figure S3 High resolution F 1s spectra .....                                                      | S8  |
| Figure S4 High resolution C 1s spectra .....                                                      | S9  |
| Figure S5 Fluorescence spectra of <b>5</b> -labelled slides .....                                 | S10 |

## Photostability measurements

The photostability of dyes **2**, **4**, **5**, **7**, **8** and **10** was recorded using a ND:YVO<sub>4</sub> laser (Millennia, Spectra Physics) with a stabilized output power of 0.2 W (for **2**, **5**, **7** and **10**) as well as 3 W (for **4** and **8**; because the absorption of these dyes is considerably smaller at the irradiation wavelength, only ca.  $\sim 1/10^{\text{th}}$ , the laser power was increased, to keep the results comparable), directed onto an ultra-micro fluorescence cuvette (Hellma, 105.251-QS) containing 45  $\mu\text{L}$  of the dye in acetonitrile with the absorbance adjusted to 0,25 at 532 nm for all the dyes. The fluorescence was recorded with a fibre spectrometer (HR4000, Ocean Optics).

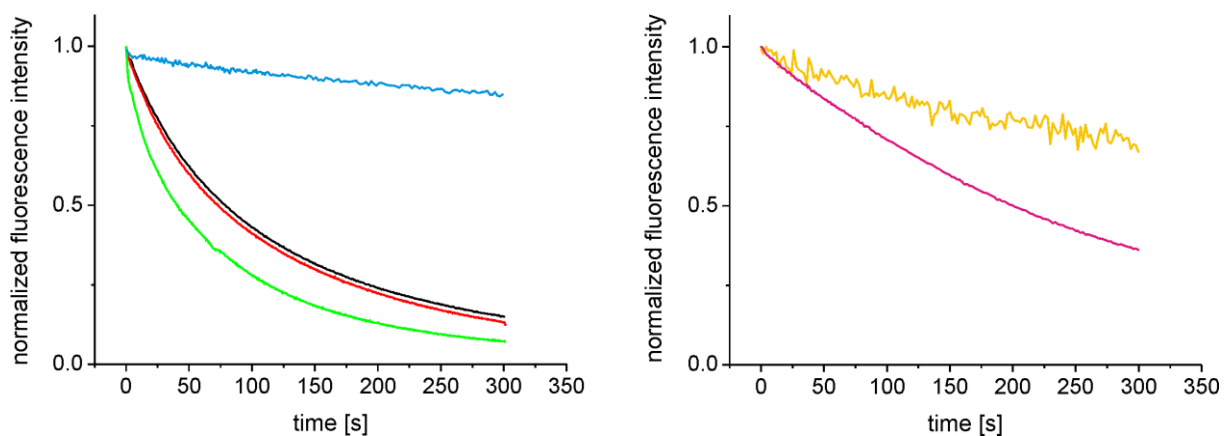

**Figure S1.** Decrease of fluorescence intensity of (left) **2** (black), **5** (blue), **7** (red) and **10** (green) and (right) **4** (yellow) and **8** (magenta) in acetonitrile as a function of time under cw-laser irradiation as described in the text.

**Table S1.** Bond lengths and angles of the BF<sub>2</sub>N<sub>2</sub> tetrahedron.

| Compound | B1-N1 [Å] | B1-N2 [Å] | B1-F1 [Å] | B1-F2 [Å] | N1-B1-N2 [°] | F1-B1-F2 [°] |
|----------|-----------|-----------|-----------|-----------|--------------|--------------|
| <b>1</b> | 1.556(4)  | 1.550(3)  | 1.384(2)  | 1.384(2)* | 107.4(2)     | 110.5(2)*    |
| <b>2</b> | 1.556(5)  | 1.544(5)  | 1.397(4)  | 1.408(5)  | 108.1(3)     | 108.9(3)     |
| <b>3</b> | 1.551(4)  | 1.551(4)* | 1.394(3)  | 1.394(3)* | 108.0(4)*    | 110.2(4)*    |
| <b>5</b> | 1.568(6)  | 1.564(6)  | 1.378(5)  | 1.385(5)  | 106.1(3)     | 110.6(4)     |
|          | 1.566(6)  | 1.581(6)  | 1.375(5)  | 1.386(5)  | 105.8(3)     | 111.5(3)     |
| <b>6</b> | 1.519(7)  | 1.579(8)  | 1.421(7)  | 1.365(7)  | 107.3(3)     | 109.8(4)     |
| <b>7</b> | 1.550(4)  | 1.529(4)  | 1.382(4)  | 1.388(4)  | 107.1(2)     | 110.0(2)     |
| <b>8</b> | 1.589(9)  | 1.564(9)  | 1.369(8)  | 1.424(8)  | 107.6(5)     | 110.6(6)     |

\* Values resulting from symmetry operations

**Table S2.** Additional selected spectroscopic data of **1–8** in various solvents at 298 K.

| Dye      | Solvent <sup>[a]</sup> | $\lambda_{\text{abs}}$<br>/nm | $\lambda_{\text{em}}$<br>/nm | $\Delta\tilde{\nu}_{\text{abs-em}}$<br>/cm <sup>-1</sup> | $\Phi_f$ | $\tau_f$<br>/ns | $k_r^{[b]}$<br>/10 <sup>8</sup> s <sup>-1</sup> | $k_{nr}^{[b]}$<br>/10 <sup>8</sup> s <sup>-1</sup> |
|----------|------------------------|-------------------------------|------------------------------|----------------------------------------------------------|----------|-----------------|-------------------------------------------------|----------------------------------------------------|
| <b>1</b> | Bu <sub>2</sub> O      | 517                           | 525                          | 295                                                      | 1.00     | 5.51            | 2.0                                             | 0.0                                                |
|          | Tol                    | 521                           | 531                          | 361                                                      | 1.00     | 4.98            | 2.3                                             | 0.0                                                |
|          | EtOH                   | 515                           | 524                          | 334                                                      | 1.00     | 5.88            | 1.7                                             | 0.0                                                |
|          | MeOH                   | 514                           | 523                          | 335                                                      | 1.00     | 6.12            | 1.7                                             | 0.0                                                |
| <b>2</b> | Bu <sub>2</sub> O      | 543                           | 555                          | 398                                                      | 0.94     | 5.58            | 1.5                                             | 0.1                                                |
|          | Tol                    | 547                           | 560                          | 456                                                      | 0.96     | 6.23            | 1.7                                             | 0.1                                                |
|          | EtOH                   | 541                           | 554                          | 434                                                      | 0.90     | 6.53            | 1.4                                             | 0.2                                                |
|          | MeOH                   | 540                           | 553                          | 435                                                      | 0.89     | 6.69            | 1.3                                             | 0.2                                                |
| <b>4</b> | Bu <sub>2</sub> O      | 697                           | 770                          | 1360                                                     | 0.17     | 1.04            | 1.6                                             | 8.0                                                |
| <b>5</b> | Bu <sub>2</sub> O      | 521                           | 536                          | 537                                                      | 0.16     | 0.98            | 1.9                                             | 8.6                                                |
|          | Tol                    | 525                           | 544                          | 665                                                      | 0.38     | 1.96            | 1.9                                             | 3.2                                                |
|          | EtOH                   | 518                           | 534                          | 578                                                      | 0.14     | 0.88            | 1.6                                             | 9.8                                                |
|          | MeOH                   | 516                           | 532                          | 583                                                      | 0.14     | 0.93            | 1.5                                             | 9.3                                                |
| <b>6</b> | Bu <sub>2</sub> O      | 507                           | 517                          | 382                                                      | 0.58     | 2.05            | 2.1                                             | 1.5                                                |
|          | Tol                    | 510                           | 521                          | 451                                                      | 0.88     | 3.59            | 2.5                                             | 0.3                                                |
|          | EtOH                   | 505                           | 516                          | 422                                                      | 0.47     | 2.35            | 2.0                                             | 2.3                                                |
|          | MeOH                   | 504                           | 514                          | 424                                                      | 0.48     | 2.59            | 1.9                                             | 2.0                                                |
| <b>7</b> | Bu <sub>2</sub> O      | 531                           | 543                          | 416                                                      | 0.66     | 4.54            | 1.5                                             | 0.8                                                |
|          | Tol                    | 534                           | 549                          | 512                                                      | 0.70     | 4.96            | 1.4                                             | 0.6                                                |
|          | EtOH                   | 530                           | 545                          | 553                                                      | 0.66     | 4.41            | 1.5                                             | 0.8                                                |
|          | MeOH                   | 529                           | 543                          | 487                                                      | 0.65     | 4.85            | 1.3                                             | 0.7                                                |
| <b>8</b> | Bu <sub>2</sub> O      | 641                           | 653                          | 357                                                      | 0.75     | 4.6             | 1.6                                             | 0.6                                                |
|          | Tol                    | 647                           | 660                          | 350                                                      | 0.75     | 4.42            | 1.7                                             | 0.6                                                |

[a] Hex = *n*-hexane, Bu<sub>2</sub>O = dibutyl ether, Et<sub>2</sub>O = diethyl ether, THF = tetrahydrofuran.

[b]  $k_r = \Phi_f \times \tau_f^{-1}$ ,  $k_{nr} = (1 - \Phi_f) \times \tau_f^{-1}$ ; measurement uncertainties:  $\pm 0.01 \times 10^8 \text{ s}^{-1}$ .

**Table S3.** Selected dihedral angles between various planes of the energy-minimized BODIPY structures of **3** and **4** as obtained by the density functional theory (DFT) method employing the hybrid functional B3LYP with a 6-31G basis set.

| Compound | $\Theta_{\text{py-py}'}^{[a]}$ /Angle [°] | $\Theta_{\text{dp-meso}}^{[b]}$ /Angle [°] | $\Theta_{\text{sty-sty}'}^{[c]}$ /Angle [°] | $\Theta_{\text{dp-sty}}^{[d]}$ /Angle [°] |
|----------|-------------------------------------------|--------------------------------------------|---------------------------------------------|-------------------------------------------|
| <b>3</b> | 2.8                                       | 77.3                                       | 20.2                                        | 23.7                                      |
|          |                                           |                                            |                                             | 23.7                                      |
| <b>4</b> | 2.0                                       | 76.9                                       | 33.0                                        | 48.8                                      |
|          |                                           |                                            |                                             | 34.8                                      |

[a] py, py' = planes defined by pyrrole rings of BODIPY core (C1–C4,N1 and C5–C9,N2), dp = plane defined by atoms C1–C9,N1,N2,B1 for dp and C10–C15 for *meso*-group, sty, sty' = planes defined by atoms of the aromatic parts of the styryl extensions.

**Table S4.** Total formal XPS elemental composition of investigated slides in at-%.

| EC <sup>[a]</sup> | bare glass <sup>[b]</sup> | APTES <sup>[c]</sup> | APTES + <b>5</b> (I) <sup>[d]</sup> | APTES + <b>5</b> (II) <sup>[d]</sup> | APTES + <b>5</b> (II) <sup>[e]</sup> | <b>5</b> <sup>[f]</sup> |
|-------------------|---------------------------|----------------------|-------------------------------------|--------------------------------------|--------------------------------------|-------------------------|
|                   | A <sup>[g]</sup>          | B <sup>[g]</sup>     | C <sup>[g]</sup>                    | D <sup>0</sup> <sup>[g]</sup>        | D <sup>60</sup> <sup>[g]</sup>       | E <sup>[g]</sup>        |
| C                 | 6.3                       | 51.0                 | 38.6                                | 43.2                                 | 50.6                                 | 8.9                     |
| N                 | 0.5                       | 7.4                  | 6.5                                 | 7.0                                  | 8.3                                  | 1.1                     |
| O                 | 63.5                      | 28.2                 | 31.6                                | 27.7                                 | 21.1                                 | 64.3                    |
| Si                | 21.4                      | 13.1                 | 16.7                                | 14.9                                 | 10.5                                 | 21.7                    |
| F                 | –                         | –                    | 2.6                                 | 4.7                                  | 8.0                                  | –                       |
| Na                | 4.7                       | 0.3                  | 1.8                                 | 1.3                                  | 1.2                                  | 1.5                     |
| Ca                | 1.6                       | –                    | –                                   | –                                    | –                                    | 0.9                     |
| Mg                | 1.2                       | –                    | 1.4                                 | 0.8                                  | –                                    | 0.8                     |
| Al                | 0.9                       | –                    | –                                   | –                                    | –                                    | 0.9                     |
| Zn                | –                         | –                    | 0.6                                 | 0.4                                  | 0.4                                  | –                       |

[a] EC = elemental composition and atom number ratios. [b] Piranha-cleaned slide. [c] APTES-functionalized slide. [d] Two different APTES-functionalized slides reacted with **5**. [e] Slide D observed at an electron emission angle of 60° instead of 0°; all other measurements also performed at 0°. [f] Piranha-cleaned slide (without APTES), treated with **5** and subjected to normal washing/drying procedure. [g] Slide abbreviation.

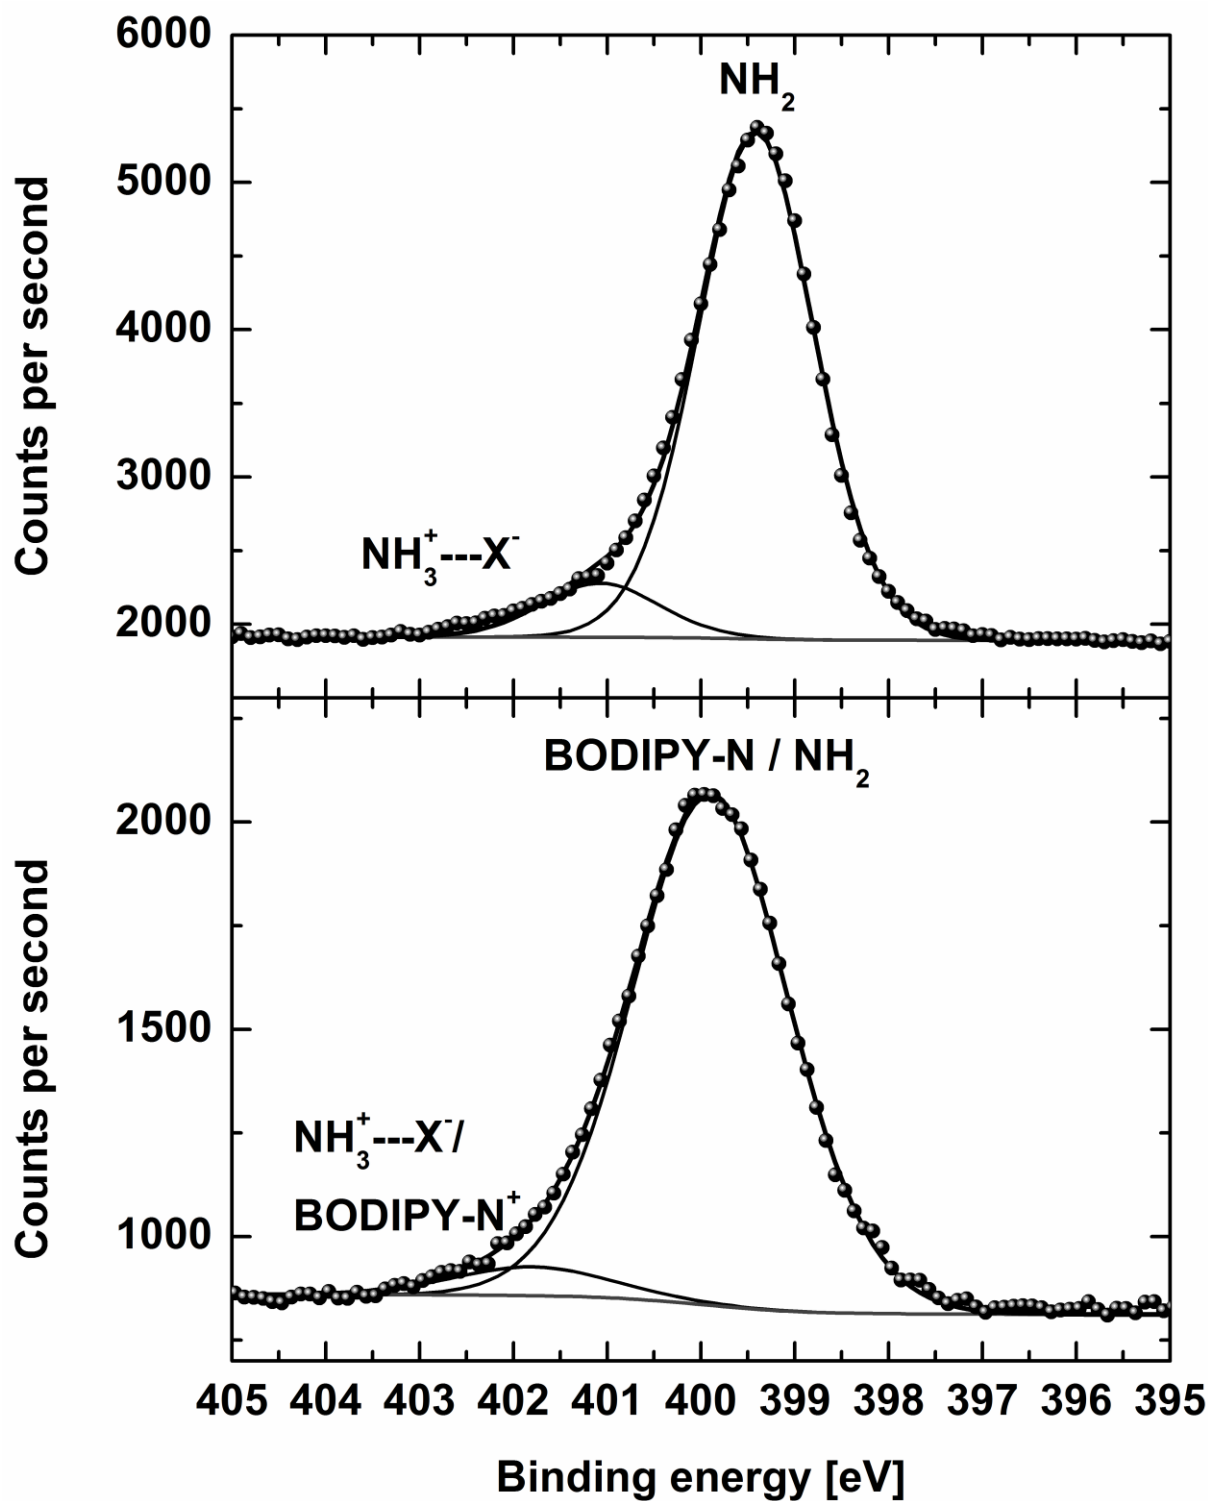

**Figure S2.** XPS high resolution N 1s spectra of the dye covered area of the slides shown in Figure 7, amino-functionalized slide prior to (slide B, top) and after reaction with **5** (slide D, bottom) as described in the main article.



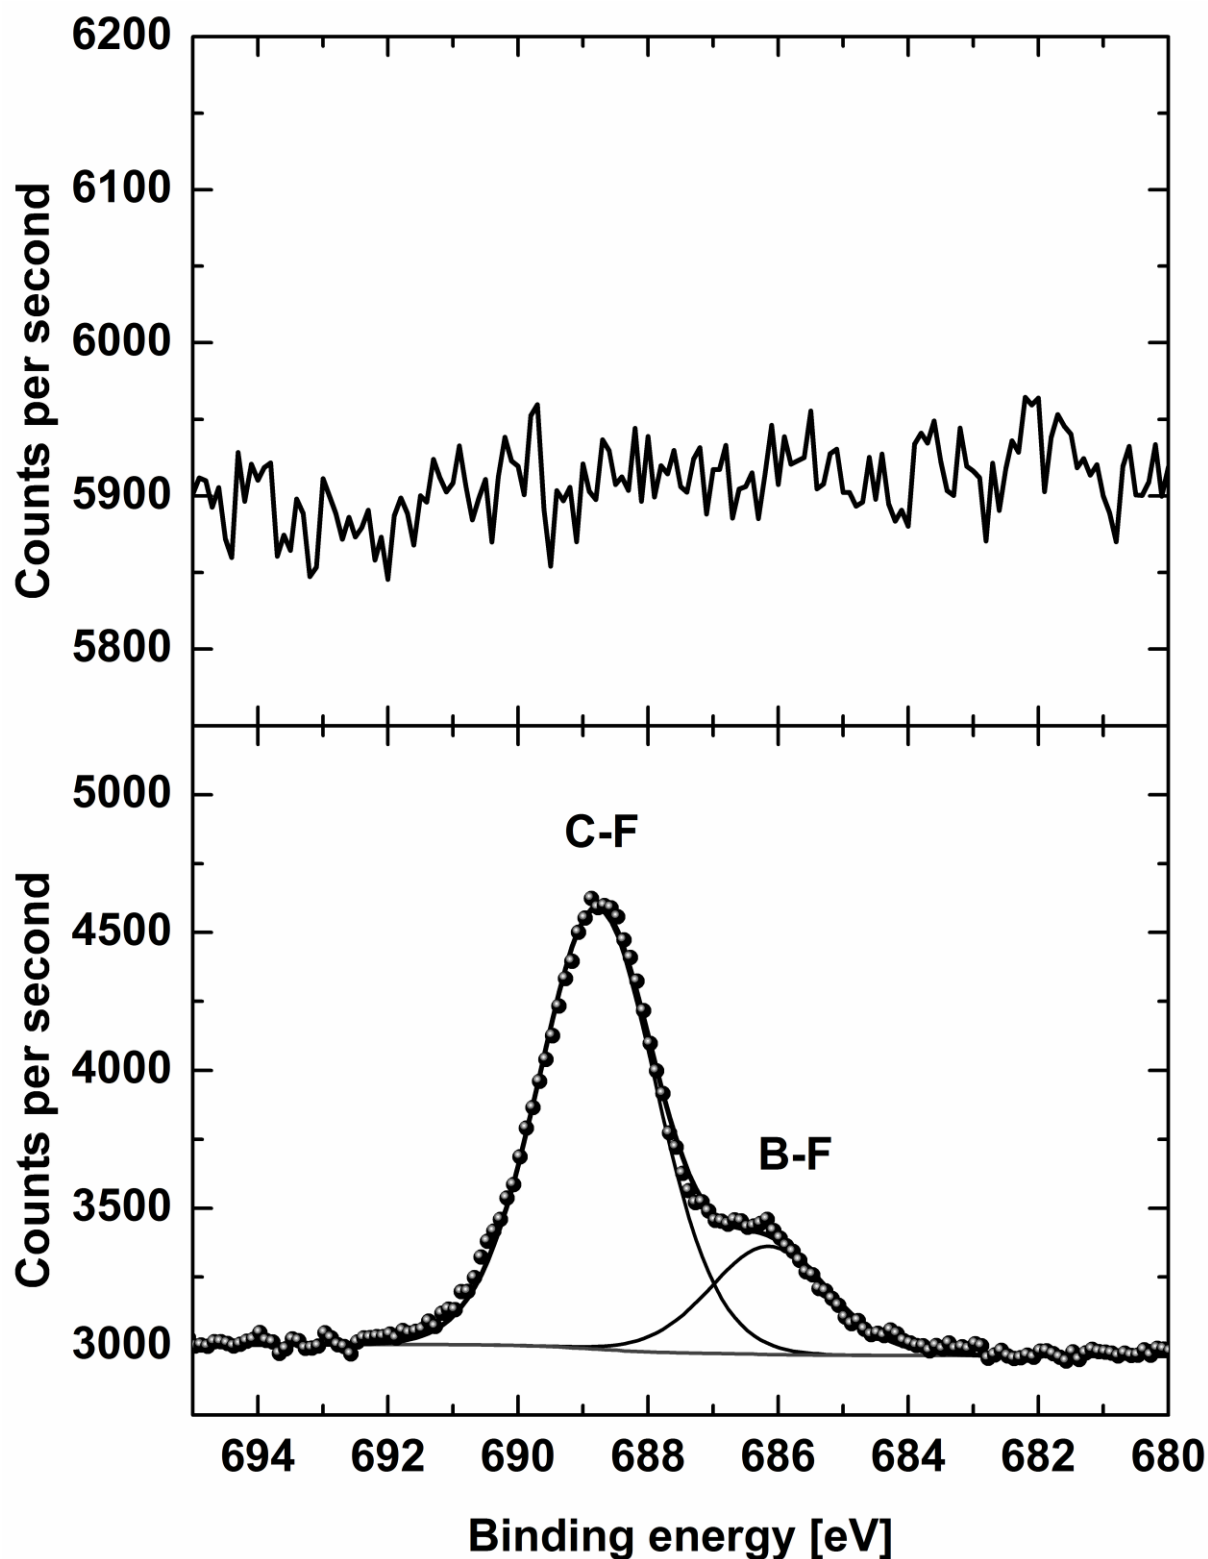

**Figure S3.** XPS high resolution F 1s spectra of the dye covered area of the slides shown in Figure 7, amino-functionalized slide prior to (slide B, top) and after reaction with **5** (slide D, bottom) as described in the main article.

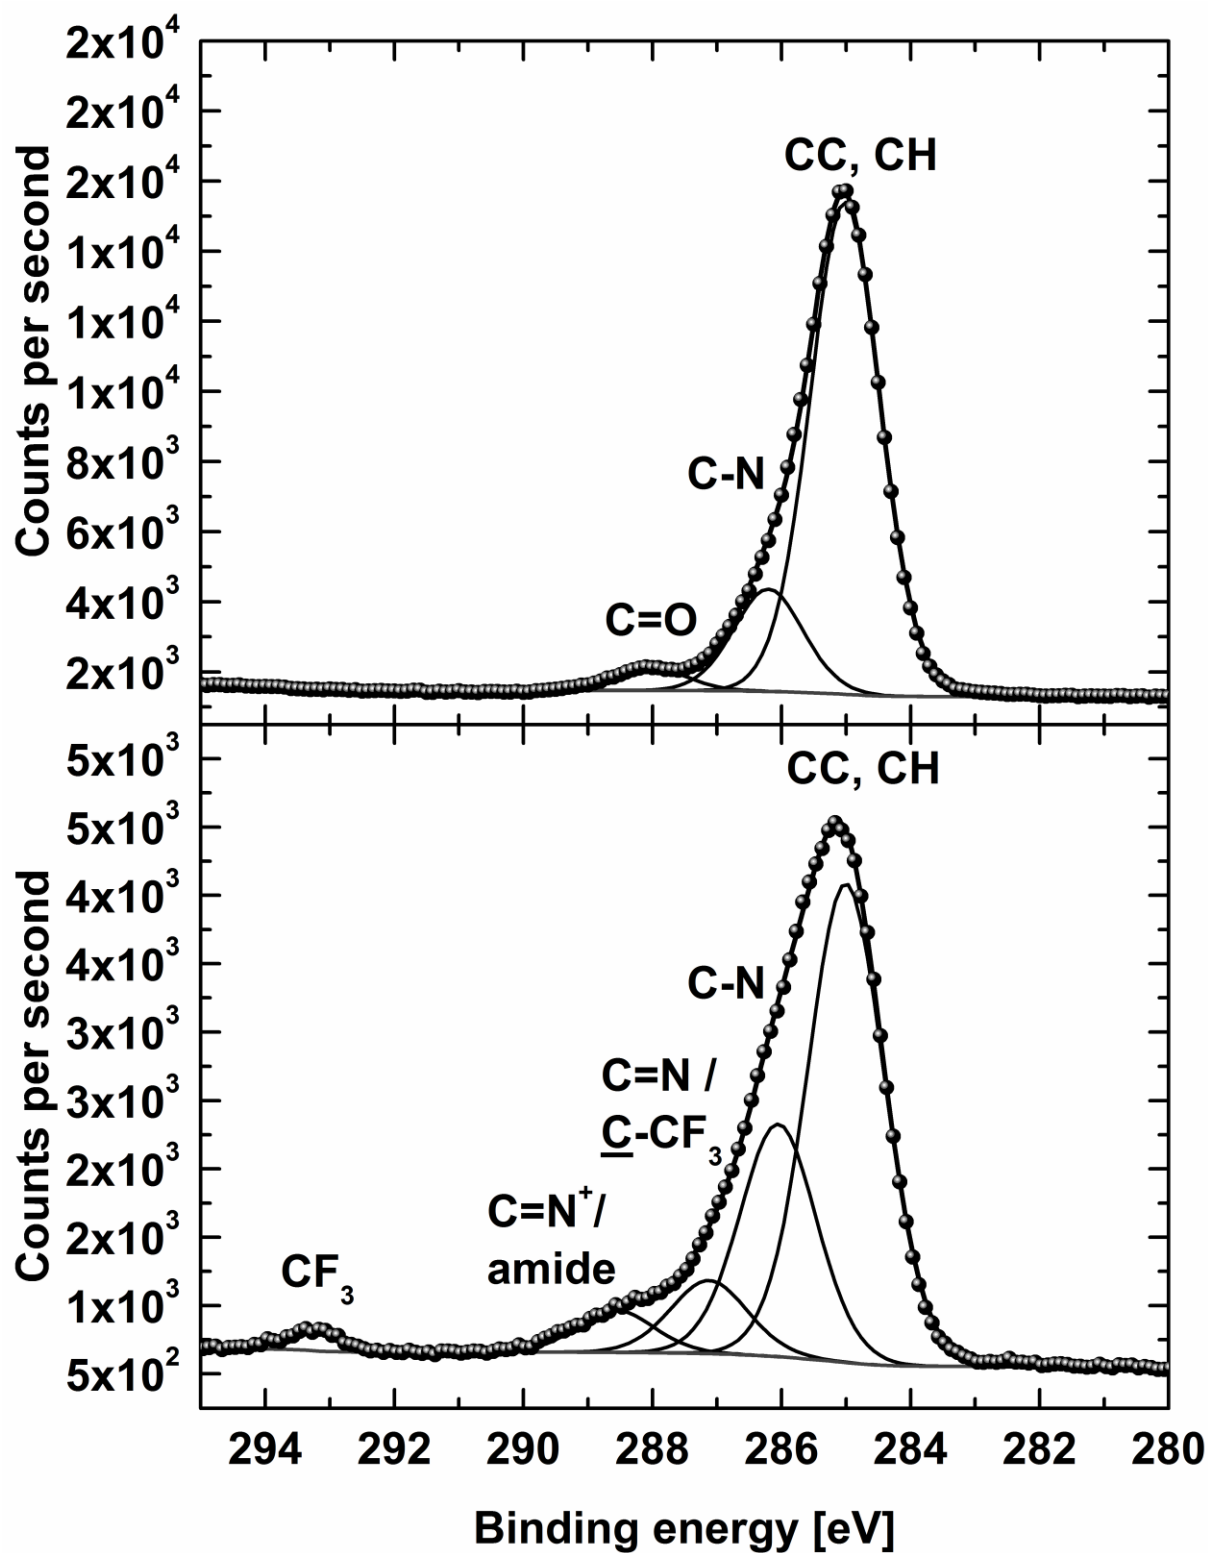

**Figure S4.** XPS high resolution C 1s spectra of the dye covered area of the slides shown in Figure 7, amino-functionalized slide prior to (slide B, top) and after reaction with **5** (slide D, bottom) as described in the main article.

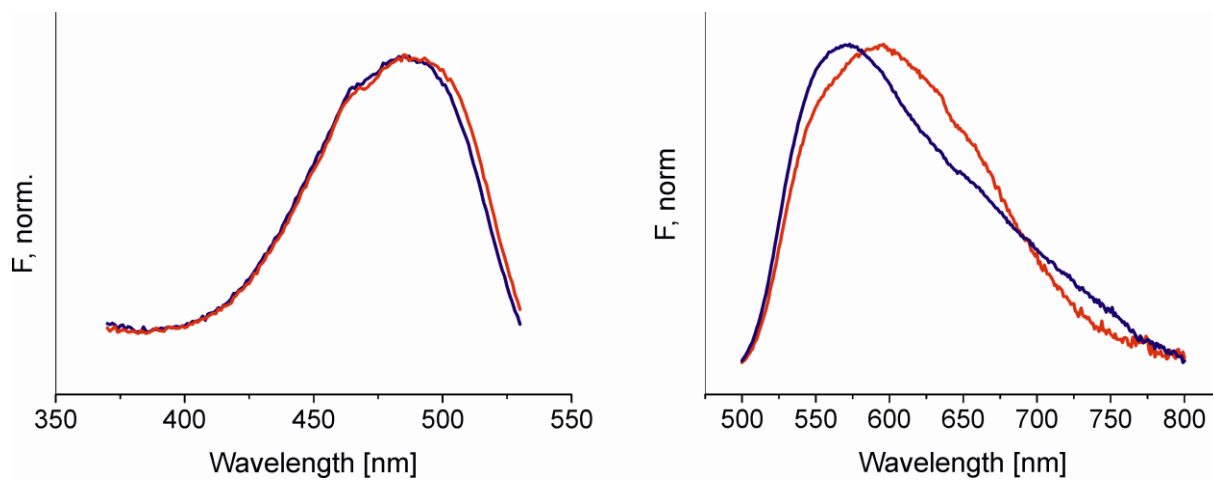

**Figure S5.** Fluorescence excitation (left, observed at 590 nm) and emission (right, excited at 466 nm) spectra of the two **5**-labelled slides discussed in the main text; slide C (blue) and slide D (red).
